# Supplementary figures and images for: Bidirectional encoding of motion contrast in the mouse superior colliculus
Source: eLife journal article supplement (doi:10.7554/elife.35261), 2018-07-02

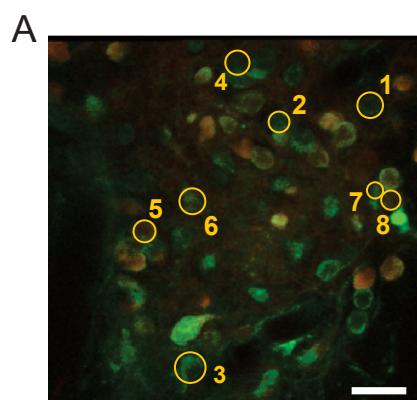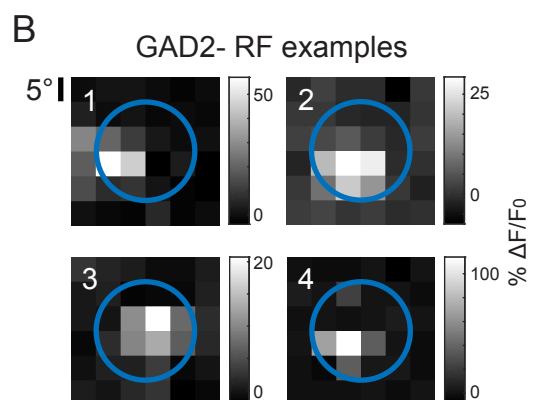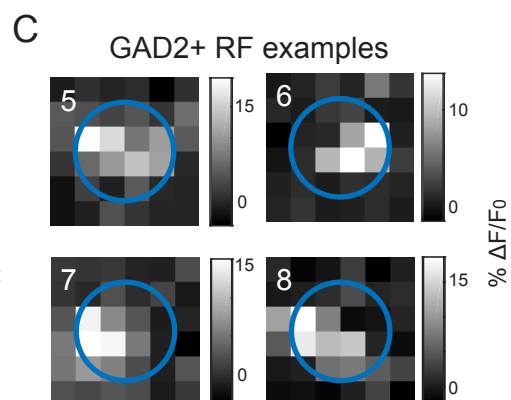

Supplement: supp [file elife-35261-supp-v1.zip]

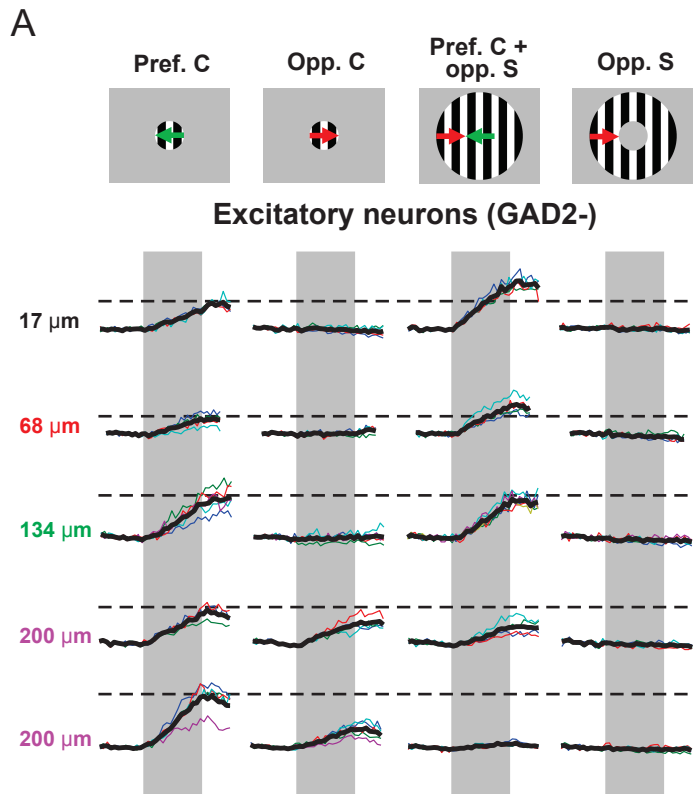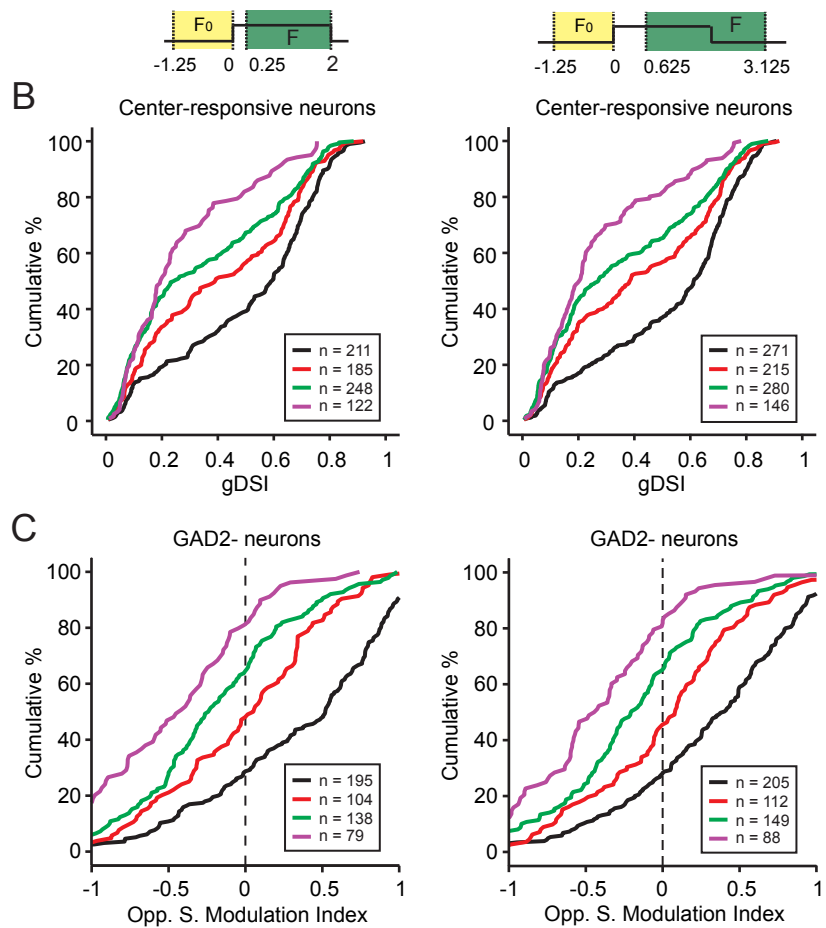

Supplement: supp [file elife-35261-supp-v1.zip]

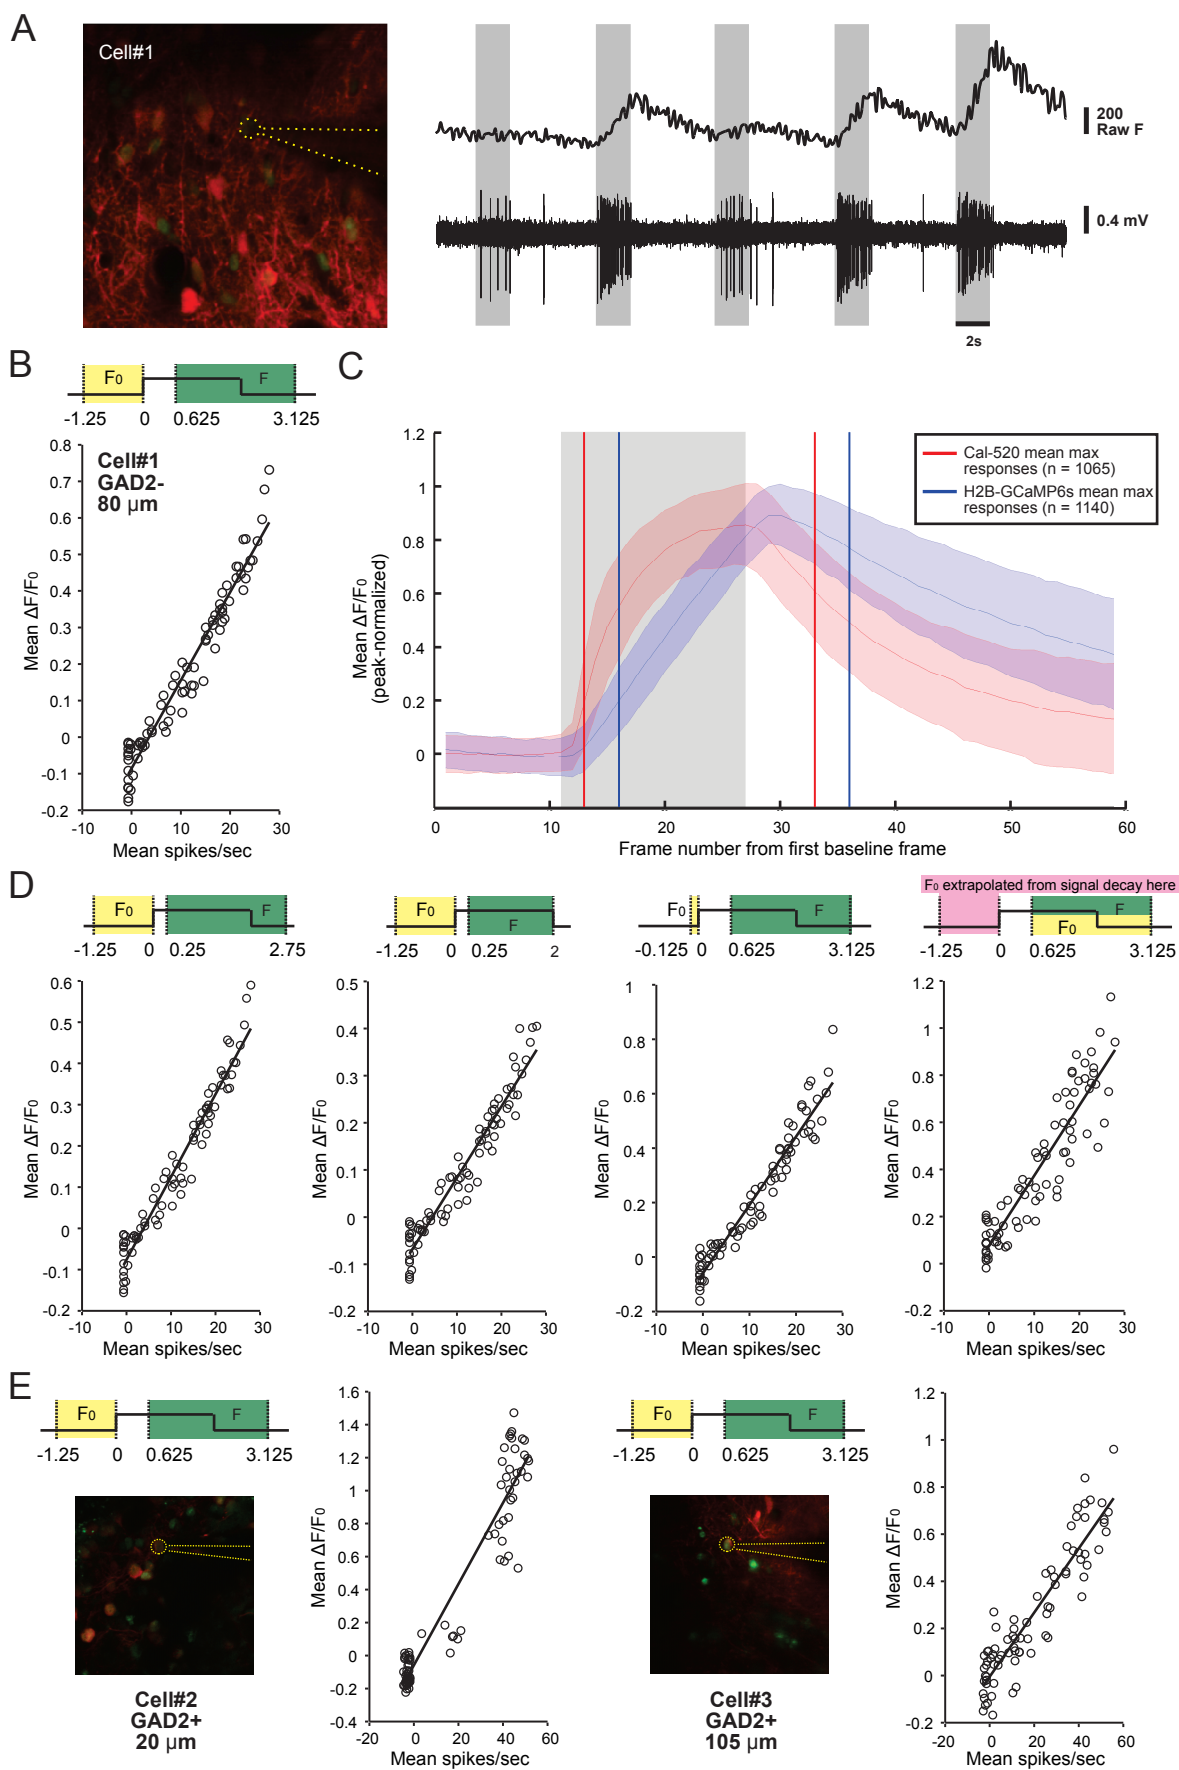

Supplement: supp [file elife-35261-supp-v1.zip]

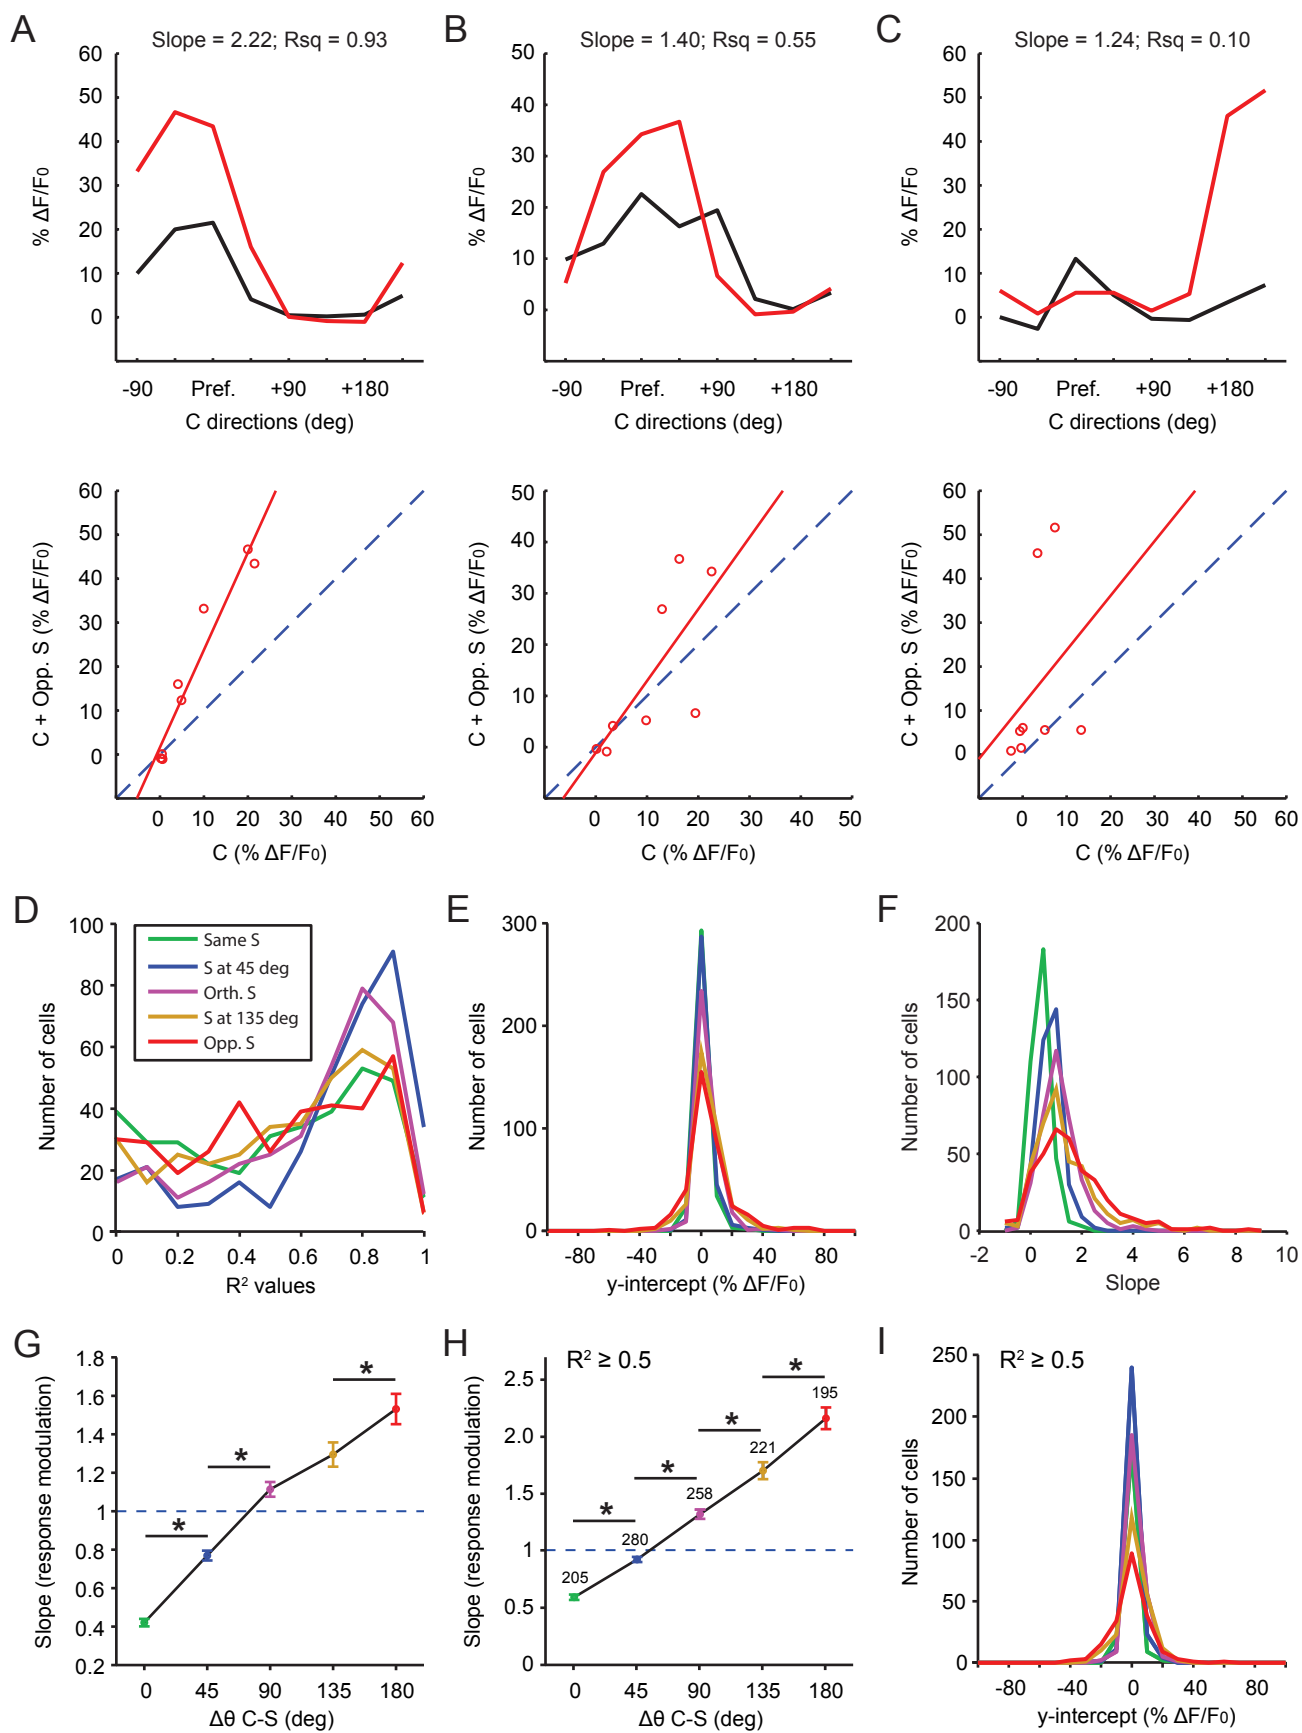

Supplement: supp [file elife-35261-supp-v1.zip]

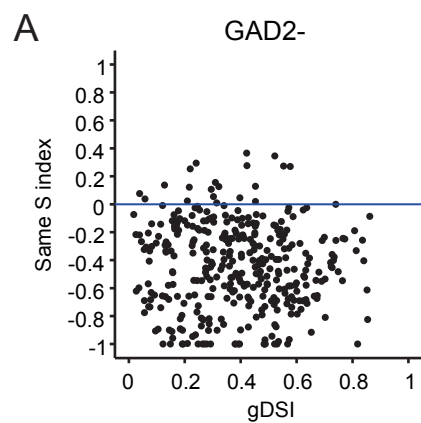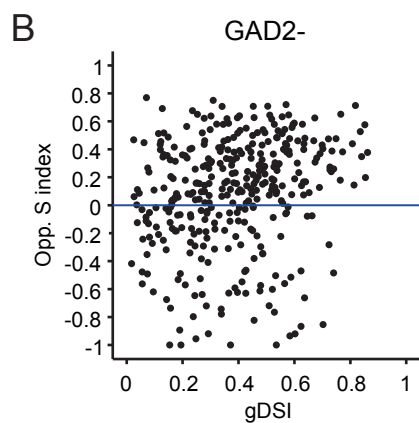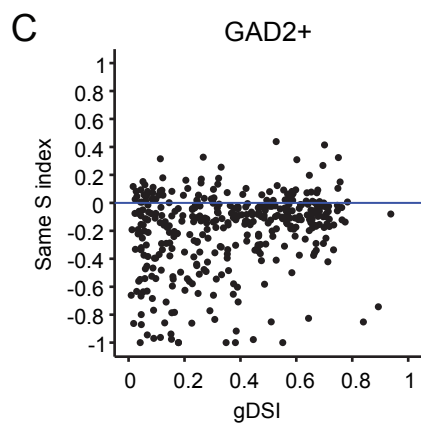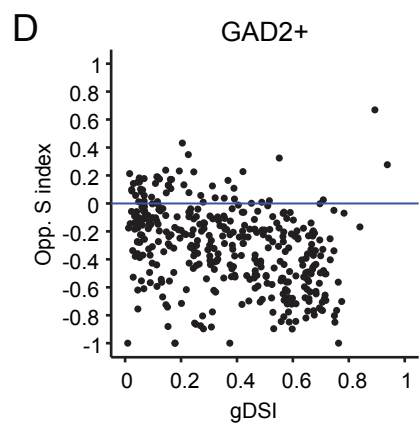

Supplement: supp [file elife-35261-supp-v1.zip]

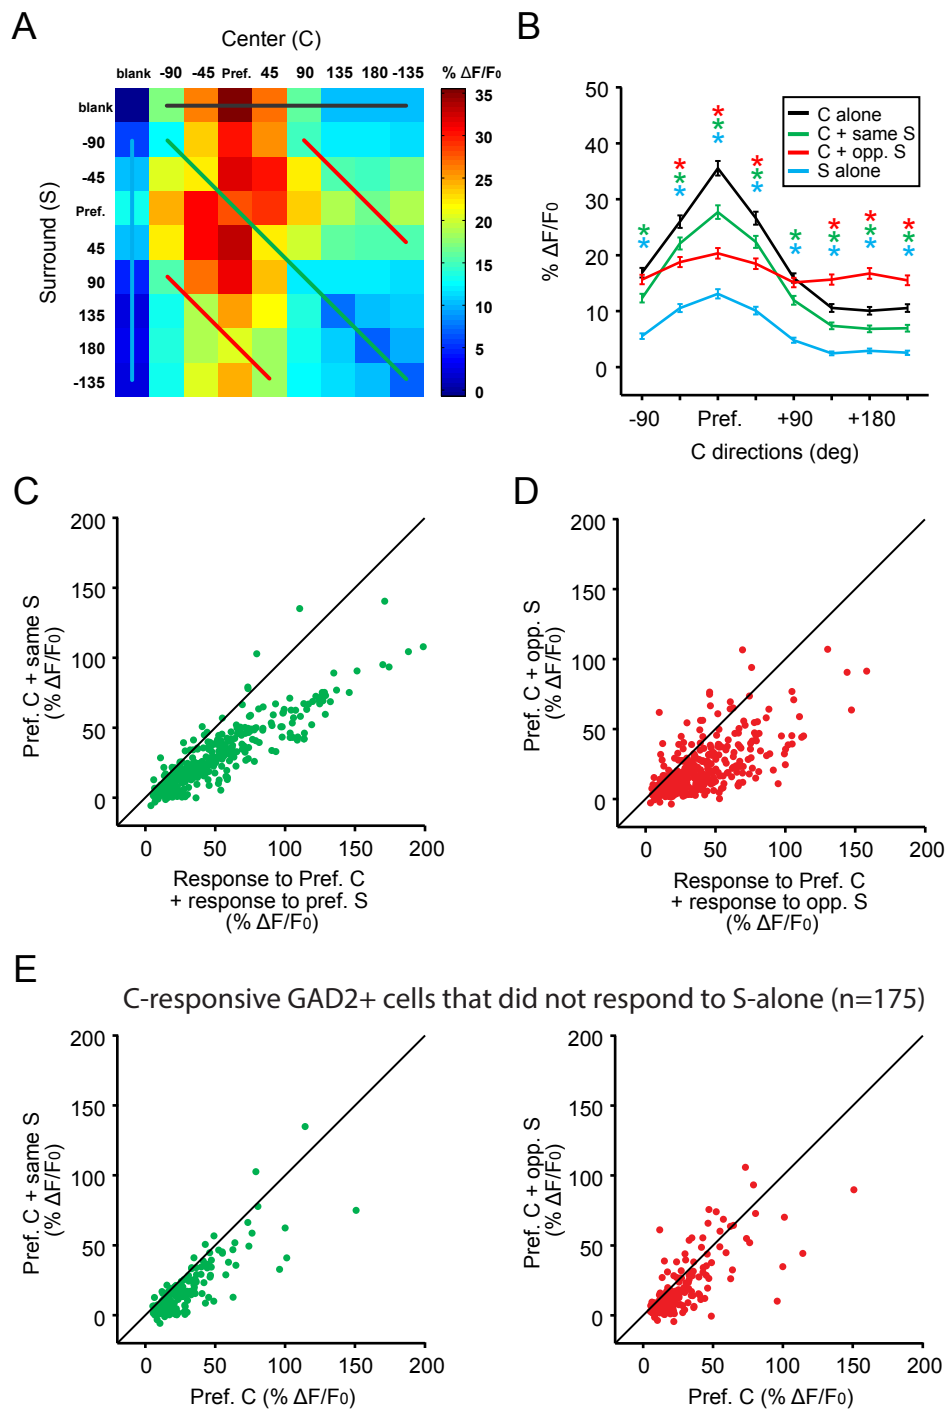

Supplement: supp [file elife-35261-supp-v1.zip]

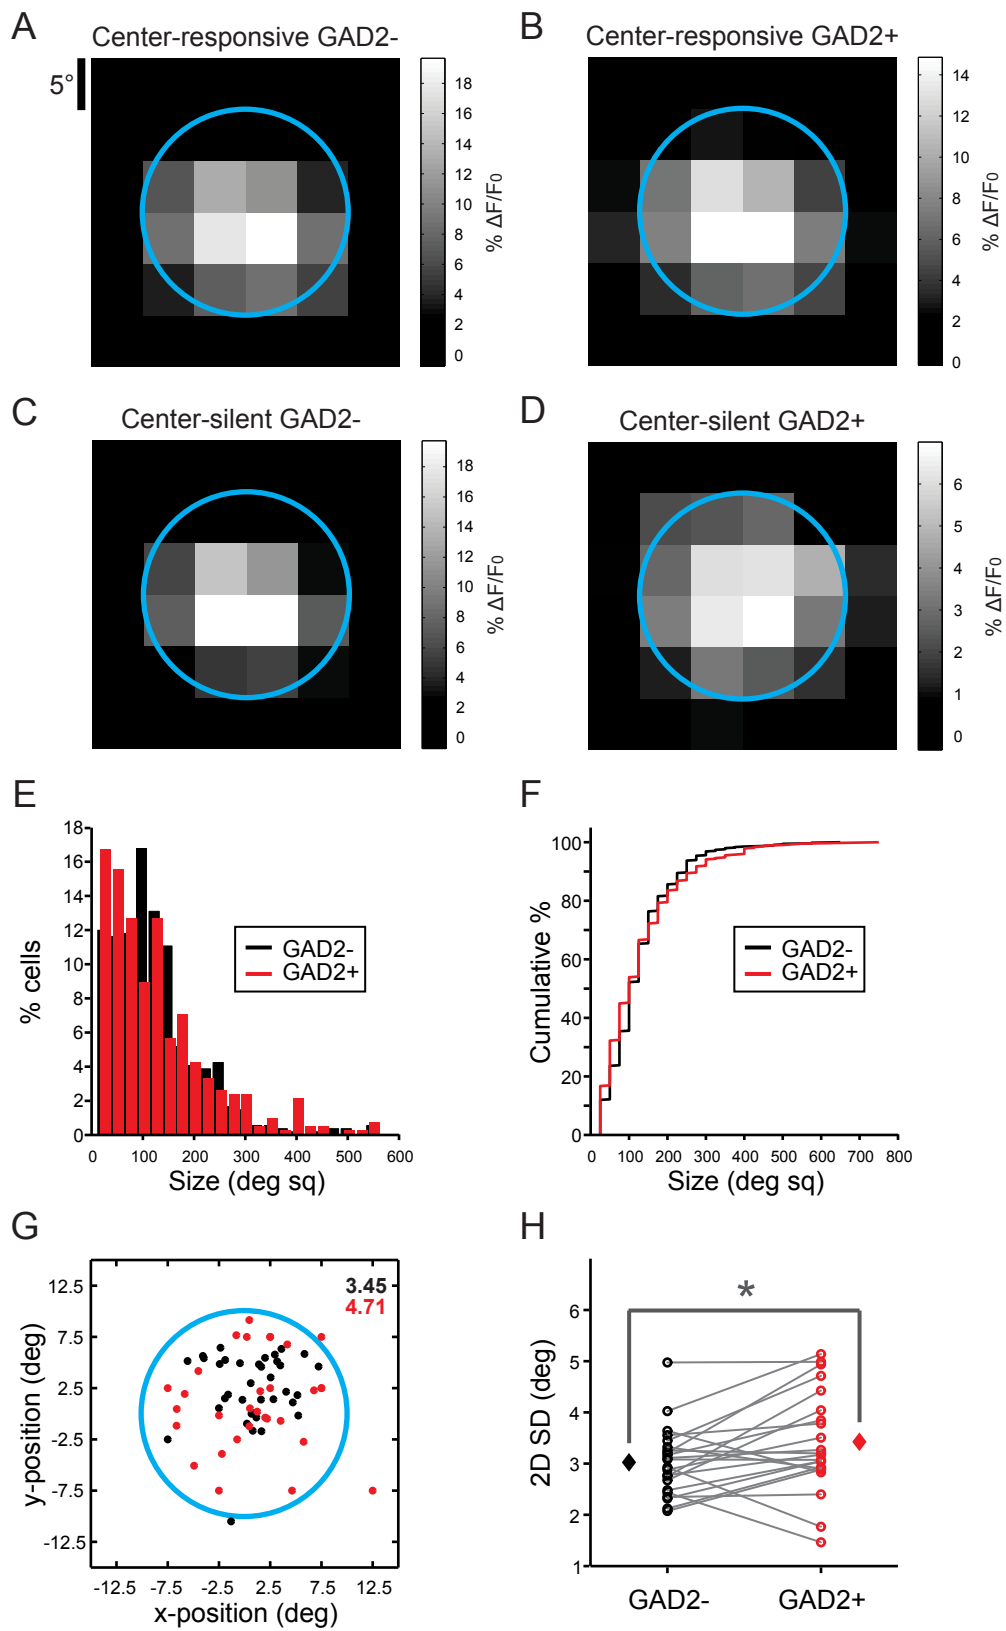

Supplement: supp [file elife-35261-supp-v1.zip]
